# Supplementary material
Source: PubMed Central journal article supplement (PMC3192975)
Supplement: mmc1.pdf [file mmc1.pdf]

## Supplementary Material

### Figure Captions

Figure S1: Dependence of average standard deviations of the angle dependent terms on distances. (a)  $E(\theta|r_{ab})$ ; (b)  $E(\psi|r_{ab})$ ; (c)  $E(\chi|r_{ab})$ . Polar atoms are nitrogen and oxygen atoms in all residue types and the SG in CYS; all other atoms are non-polar.

Figure S2: Examples of the angular dependence of the energy term on angles at given distance: (a)  $\psi$  dependence of the disulfide bond at distance of 2.25 Å; (b)  $\psi$  dependence of the N atom in the hydrogen bond between ALA N and ALA O at a distance of 2.75 Å; (c)  $\psi$  dependence of the CB between ALA CB-ALA O at a distance of 3.25 Å; (d)  $\theta$  dependence of the CB between ALA CB-ALA CB at a distance 3.75 Å; (e)  $\psi$  dependence of the CB between ALA CB-ALA CB at a distance of 3.75 Å; (f)  $\chi$  dependence of the CB between ALACB-ALACB at a distance of 3.75 Å.

Figure S3: Covariance of angle pairs at different distances in the main-chain for the N-O interaction.

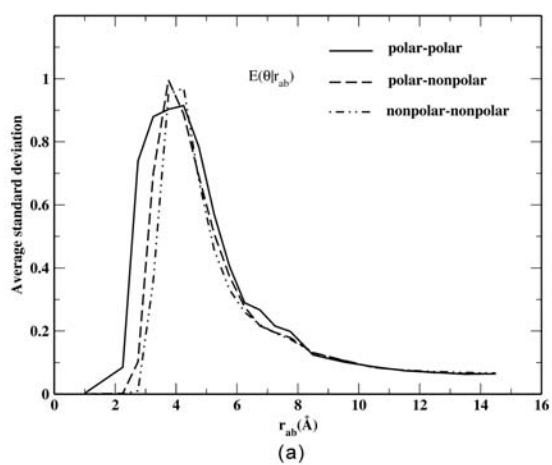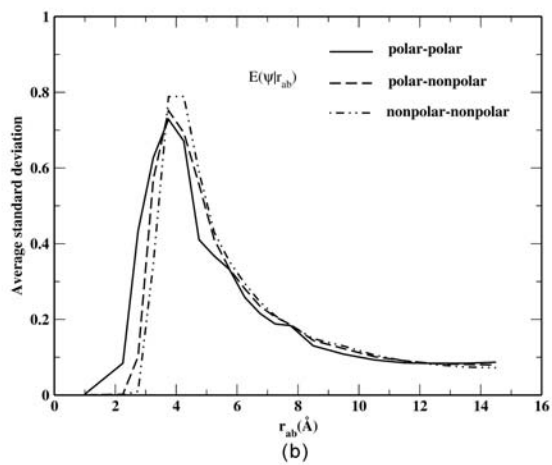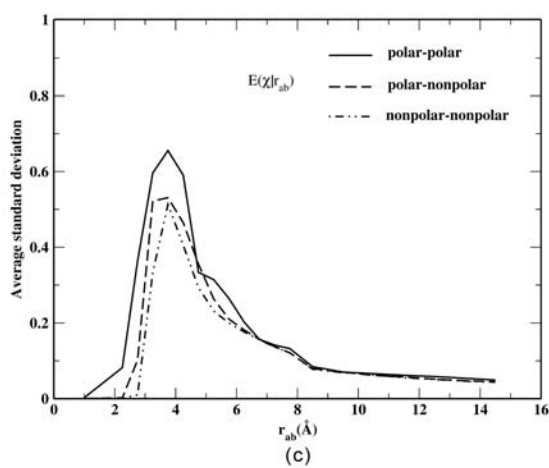

Figure S1

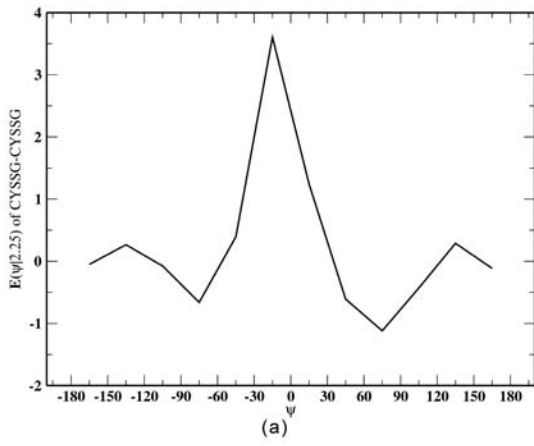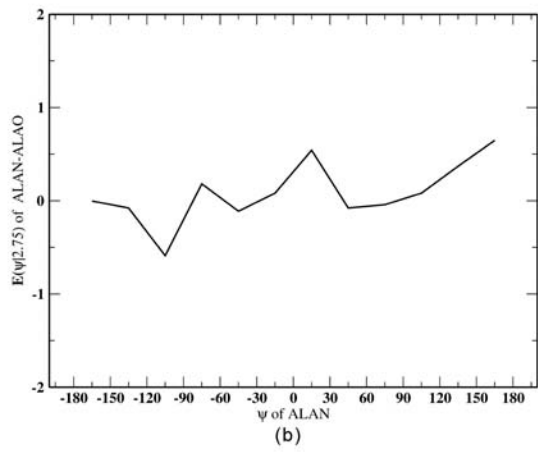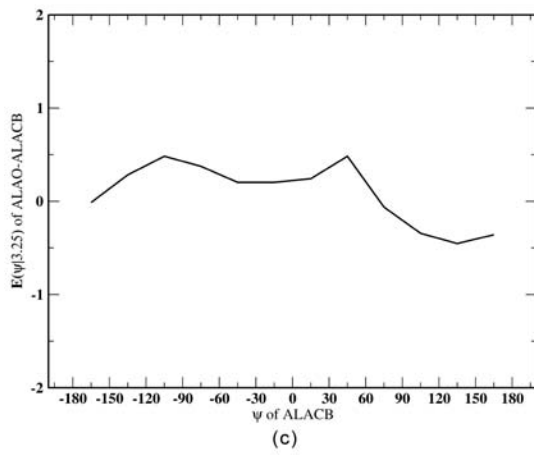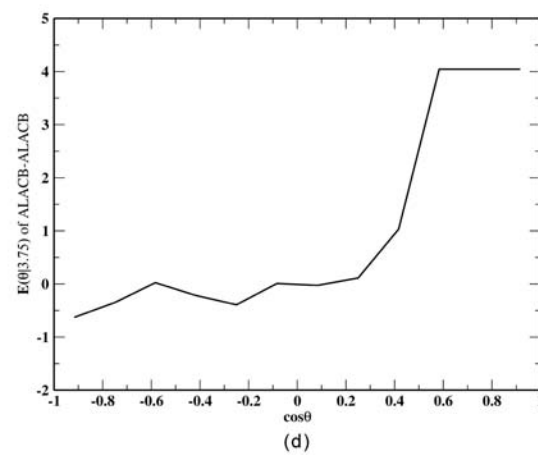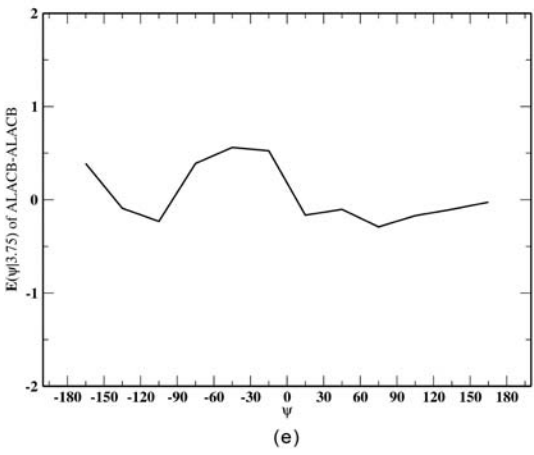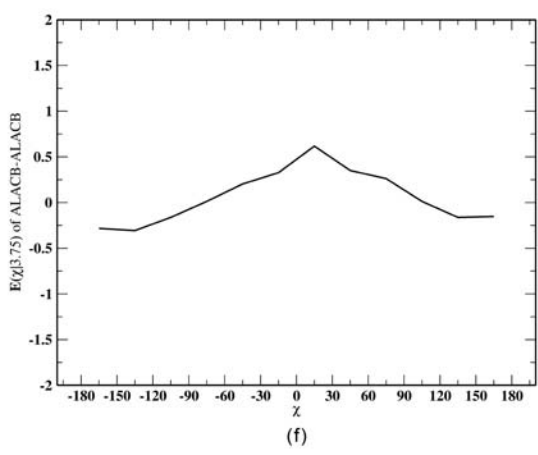

Figure S2

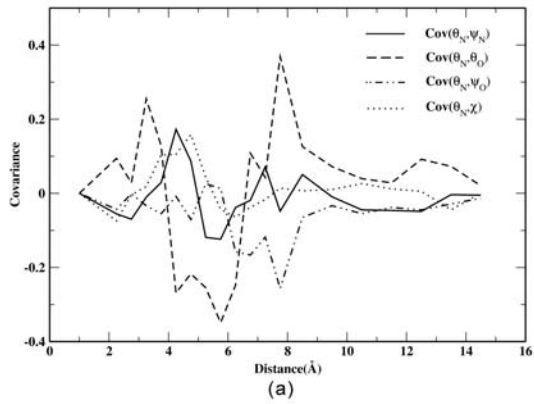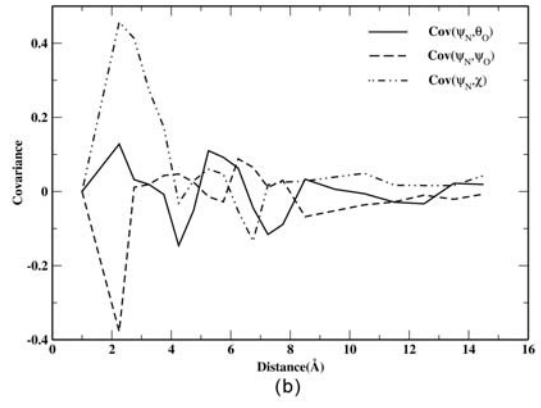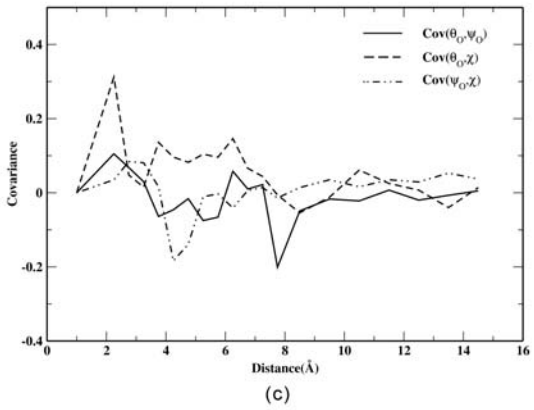

Figure S3
